# Supplementary material for: The Prophylactic Effect of Ficus carica Nanoparticles on C57BL/6 Female Mice Infected with Schistosoma mansoni
Source: Research Square preprint supplement (doi:10.21203/rs.3.rs-5735794/v1), 2025-01-06
Supplement: Supplementary file 1 [file 04bd75866aac933f13fd3081.docx]

**Acknowledgements:** The resources that Mansoura University offers are greatly appreciated. The figures were designed by Naira Adel El-Attar (Corresponding author).

**Author contributions:** By contributing to the research, data analysis, and presentation of results, as well as the drafting and editing of the manuscript by Naira Adel El-Attar and Mamdouh Rashad El-Sawi who worked to create the methodology, prepare figures and run the experiments. Mamdouh Rashad El-Sawi and Eman Ahmed El-Shabasy performed data analysis and interpretation. Naira Adel El-Attar was involved in the study consultation, the conceptualization of the manuscript, and the overall writing and editing. The content was reviewed, discussed and revised by all authors.

**Competing Interests Statement:** Naira Adel El-Attar, Mamdouh Rashad El-Sawi and Eman Ahmed El-Shabasy declare no conflict of interest.

**Availability of data statement:** The datasets generated and analyzed during the current study are available in the file; its name is supplementary file.

**Ethical approval:** The current study is reported by ARRIVE guidelines. The experimental protocol was agreed upon by the local experimental animal ethics committee of the Faculty of Medicine, Mansoura University accordance with the guide of the National Institute of Health for the care and use of Laboratory animals (NIH publication No. 8523, revised 1996) with approval number Sc. Ms. 22.12.12. The date of approval: is 16/12/2022.
